# Supplementary material for: Bupropion for the Treatment of Apathy in Alzheimer Disease: A Randomized Clinical Trial
Source: PubMed Central journal article supplement (PMC7256670; doi:10.1001/jamanetworkopen.2020.6027), 2020-05-28
Supplement: jamanetwopen-3-e206027-s002.pdf [file jamanetwopen-3-e206027-s002.pdf]

## Supplementary Online Content

Maier F, Spottke A, Bach J-P, et al. Bupropion for the treatment of apathy in Alzheimer disease: a randomized clinical trial. *JAMA Netw Open*. 2020;3(5):e206027.  
doi:10.1001/jamanetworkopen.2020.6027

**eTable 1.** Demographics, Screening Characteristics and Outcome Parameters of Patients With Bupropion Versus Placebo (PP Population)

**eFigure.** Apathy Evaluation Scale-Clinician Total Score Over Time in Patients With Alzheimer's Disease Receiving Bupropion or Placebo (PP Population)

**eTable 2.** Results of the Mixed-Effect Model Repeated Measure (PP population): Difference Between Baseline and 12-Weeks Between Treatment Groups Corrected for the Baseline Score, Site and Co-medication With Donepezil/Galantamine

**eTable 3.** Comparison of Adverse and Serious Adverse Events in DAT Patients Receiving Bupropion or Placebo (PP Population)

This supplementary material has been provided by the authors to give readers additional information about their work.

**SUPPLEMENT DATA – Per-protocol Analysis**

**eTable 1.** Demographics, Screening Characteristics and Outcome Parameters of Patients With Bupropion Versus Placebo (PP Population)

|                                             | <b>All patients (N=81)</b> |           | <b>Bupropion (N=37)</b> |           | <b>Placebo (N=44)</b> |           |                      |
|---------------------------------------------|----------------------------|-----------|-------------------------|-----------|-----------------------|-----------|----------------------|
| <b>Continuous variables</b>                 | <b>mean</b>                | <b>SD</b> | <b>mean</b>             | <b>SD</b> | <b>mean</b>           | <b>SD</b> | <b>p<sup>‡</sup></b> |
| Age (yrs)                                   | 74.1                       | 5.7       | 74.3                    | 5.5       | 73.9                  | 6         | .75                  |
| Education (yrs)                             | 9.6                        | 2.6       | 9.1                     | 2.3       | 10.1                  | 2.8       | .09                  |
| NPI Item Apathy                             | 7.4                        | 2.8       | 7.3                     | 3.1       | 7.4                   | 2.6       | .95                  |
| NPI Item Depression                         | 0.5                        | 0.9       | 0.6                     | 1.1       | 0.3                   | 0.8       | .24                  |
| <b>Categorical variables</b>                | <b>N</b>                   | <b>%</b>  | <b>N</b>                | <b>%</b>  | <b>N</b>              | <b>%</b>  |                      |
| Males                                       | 51                         | 63        | 22                      | 59.5      | 29                    | 65.9      | .55                  |
| MMSE > 18                                   | 49                         | 60.5      | 23                      | 62.2      | 26                    | 59.1      | .78                  |
| Consent form signed by legal representative | 22                         | 27.2      | 10                      | 27        | 12                    | 27.3      | .98                  |
| Co-Medication with donepezil /galantamine   | 56                         | 69.1      | 24                      | 64.9      | 32                    | 72.7      | .45                  |
| <b>Primary Outcome Parameter</b>            | <b>mean</b>                | <b>SD</b> | <b>mean</b>             | <b>SD</b> | <b>mean</b>           | <b>SD</b> | <b>p</b>             |
| AES-Clinician total                         | 51.3                       | 8.5       | 52.4                    | 9         | 50.3                  | 8.1       | .26                  |
| <b>Secondary Outcome Parameter</b>          |                            |           |                         |           |                       |           |                      |
| AES-Clinician Cognition                     | 24.0                       | 4.1       | 24.6                    | 4.0       | 23.5                  | 4.1       | .23                  |
| AES-Clinician Behavior                      | 13.1                       | 2.5       | 13.5                    | 2.8       | 12.8                  | 2.2       | .21                  |
| AES-Clinician Emotion                       | 5                          | 1.5       | 5.2                     | 1.6       | 4.8                   | 1.4       | .21                  |
| AES-Clinician Other                         | 9.2                        | 1.8       | 9.1                     | 1.8       | 9.2                   | 1.9       | .87                  |
| NPI total                                   | 15.6                       | 9.3       | 15.7                    | 8.5       | 15.6                  | 10.1      | .98                  |
| NPI Distress total                          | 7.7                        | 4.9       | 7.9                     | 4.8       | 7.5                   | 5.1       | .71                  |
| ADCS-ADL                                    | 52.4                       | 16.4      | 50.9                    | 16.6      | 53.7                  | 16.3      | .44                  |
| ADAS-Cog                                    | 35.1                       | 12.2      | 34.7                    | 12.6      | 35.5                  | 11.9      | .78                  |
| MMSE                                        | 19.2                       | 4.2       | 19.3                    | 4.2       | 19.1                  | 4.3       | .83                  |
| MADRS                                       | 9.2                        | 6         | 10.6                    | 5.7       | 8                     | 6         | .05                  |
| QoL-AD                                      | 37.4                       | 3.9       | 36.2                    | 4.3       | 38.4                  | 3.2       | <b>.01</b>           |
| QoL-AD proxy                                | 32.2                       | 5.0       | 30.6                    | 5.0       | 33.5                  | 4.7       | <b>.01</b>           |

AES, Apathy evaluation scale; NPI, neuropsychiatric inventory, ADCS-ADL, Alzheimer’s Disease Cooperative Study – Activities of daily living; ADAS-Cog, Alzheimer’s disease assessment scale – cognitive subscale; MMSE, Mini-Mental State Examination; MADRS, Montgomery Asberg Depression Rating Scale; QoL-AD, Quality of life in Alzheimer’s Disease Scale.

<sup>‡</sup> P values for continuous data: t-test for independent groups, P values for categorical data: Chi<sup>2</sup>-test

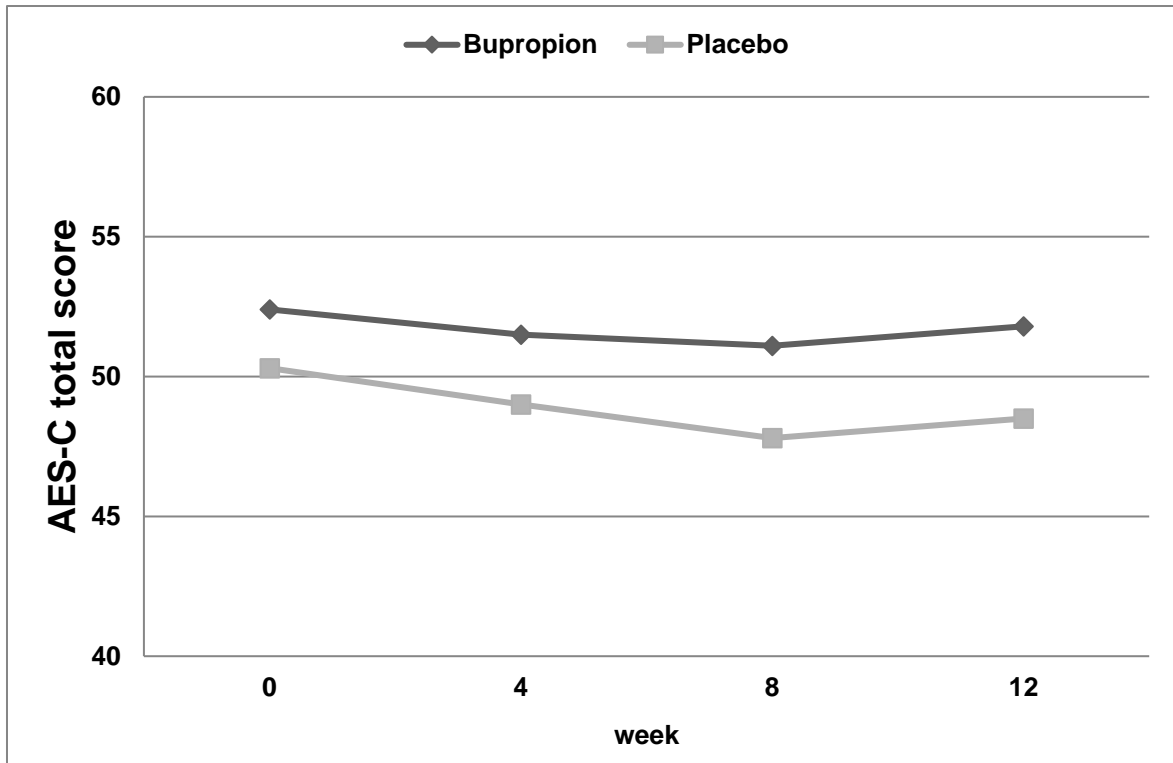

**eFigure.** Apathy Evaluation Scale-Clinician Total Score Over Time in Patients With Alzheimer’s Disease Receiving Bupropion or Placebo (PP Population)

**eTable 2.** Results of the Mixed-Effect Model Repeated Measure (PP population): Difference Between Baseline and 12-Weeks Between Treatment Groups Corrected for the Baseline Score, Site and Co-medication With Donepezil/Galantamine

|                                    |           | in Groups |        |       | between Groups |        |       |              |
|------------------------------------|-----------|-----------|--------|-------|----------------|--------|-------|--------------|
|                                    | Group     | Mean      | 95%-CI |       | Mean           | 95%-CI |       | P            |
| Primary outcome parameter          |           | Change    | lower  | upper | Change         | lower  | upper | value        |
| AES-C total score                  | Bupropion | 0.52      | -1.96  | 3.01  |                |        |       |              |
|                                    | Placebo   | 2.42      | 0.02   | 4.82  | 1.90           | -1.20  | 4.99  | 0.225        |
| <b>Secondary outcome parameter</b> |           |           |        |       |                |        |       |              |
| AES-C Cognition                    | Bupropion | 0.58      | -0.65  | 1.81  |                |        |       |              |
|                                    | Placebo   | 1.27      | 0.09   | 2.45  | 0.69           | -0.85  | 2.23  | 0.376        |
| AES-C Behavior                     | Bupropion | 0.14      | -0.77  | 1.05  |                |        |       |              |
|                                    | Placebo   | 0.63      | -0.25  | 1.51  | 0.49           | -0.65  | 1.63  | 0.390        |
| AES-C Emotional                    | Bupropion | -0.52     | -0.93  | -0.10 |                |        |       |              |
|                                    | Placebo   | 0.14      | -0.27  | 0.54  | 0.65           | 0.12   | 1.18  | <b>0.016</b> |
| AES-C Other                        | Bupropion | 0.02      | -0.55  | 0.59  |                |        |       |              |
|                                    | Placebo   | 0.31      | -0.24  | 0.87  | 0.29           | -0.43  | 1.02  | 0.423        |
| NPI total                          | Bupropion | -0.10     | -3.09  | 2.89  |                |        |       |              |
|                                    | Placebo   | 6.28      | 3.39   | 9.17  | 6.38           | 2.56   | 10.19 | <b>0.001</b> |
| NPI Distress total                 | Bupropion | -0.69     | -2.31  | 0.92  |                |        |       |              |
|                                    | Placebo   | 2.35      | 0.78   | 3.92  | 3.04           | 0.98   | 5.10  | <b>0.004</b> |
| ADCS-ADL                           | Bupropion | 2.60      | -0.08  | 5.28  |                |        |       |              |
|                                    | Placebo   | -0.37     | -2.93  | 2.20  | -2.96          | -6.41  | 0.48  | 0.091        |
| ADAS-Cog                           | Bupropion | -1.01     | -3.91  | 1.88  |                |        |       |              |
|                                    | Placebo   | -2.14     | -4.89  | 0.61  | -1.13          | -4.82  | 2.57  | 0.545        |
| MMSE                               | Bupropion | -0.06     | -1.35  | 1.23  |                |        |       |              |
|                                    | Placebo   | -0.28     | -1.54  | 0.97  | -0.23          | -1.86  | 1.41  | 0.784        |
| MADRS                              | Bupropion | -1.13     | -2.55  | 0.29  |                |        |       |              |
|                                    | Placebo   | 1.16      | -0.20  | 2.53  | 2.29           | 0.47   | 4.12  | <b>0.014</b> |
| QoL-AD                             | Bupropion | 0.77      | -0.41  | 1.95  |                |        |       |              |
|                                    | Placebo   | -1.07     | -2.16  | 0.04  | -1.84          | -3.32  | -0.35 | <b>0.016</b> |
| QoL-AD proxy                       | Bupropion | 0.37      | -1.01  | 1.76  |                |        |       |              |
|                                    | Placebo   | -2.22     | -3.51  | -0.93 | -2.59          | -4.34  | -0.84 | <b>0.004</b> |

AES, Apathy evaluation scale; NPI, neuropsychiatric inventory, ADCS-ADL, Alzheimer's Disease Cooperative Study – Activities of daily living; ADAS-Cog, Alzheimer's disease assessment scale – cognitive subscale; MMSE, Mini-Mental State Examination; MADRS, Montgomery Asberg Depression Rating Scale; QoL-AD, Quality of life in Alzheimer's Disease Scale.

**eTable 3.** Comparison of Adverse and Serious Adverse Events in DAT Patients Receiving Bupropion or Placebo (PP Population)

|                                            | All patients (N=81) |           | Bupropion (N=37) |           | Placebo (N=44) |           | p <sup>‡</sup>       |
|--------------------------------------------|---------------------|-----------|------------------|-----------|----------------|-----------|----------------------|
|                                            | N                   | %         | N                | %         | N              | %         |                      |
| <b>Patients with adverse event</b>         | 53                  | 65.4      | 26               | 70.3      | 27             | 61.4      | .40                  |
| <b>Patients with serious adverse event</b> | 5                   | 6.2       | 3                | 8.1       | 2              | 4.6       | .88                  |
| Hospitalization for suspected lymphoma     | 1                   | 1.2       | 1                | 2.7       | 0              | 0         |                      |
| Hospitalization for hypoglycemia           | 1                   | 1.2       | 1                | 2.7       | 0              | 0         |                      |
| Hospitalization for syncope                | 1                   | 1.2       | 1                | 2.7       | 0              | 0         |                      |
| Hospitalization for coprostasis            | 1                   | 1.2       | 0                | 0         | 1              | 2.3       |                      |
| Hospitalization for hematuria              | 1                   | 1.2       | 0                | 0         | 1              | 2.3       |                      |
| <b>All adverse events</b>                  | <b>N=106</b>        |           | <b>N=60</b>      |           | <b>N=46</b>    |           |                      |
|                                            | <b>Mean</b>         | <b>SD</b> | <b>Mean</b>      | <b>SD</b> | <b>Mean</b>    | <b>SD</b> | <b>p<sup>‡</sup></b> |
| Number of adverse events                   | 1.3                 | 1.5       | 1.5              | 1.7       | 1.0            | 1.2       | .16                  |
|                                            | <b>N</b>            | <b>%</b>  | <b>N</b>         | <b>%</b>  | <b>N</b>       | <b>%</b>  |                      |
| All unserious adverse events               | 101                 | 95.3      | 57               | 95.0      | 44             | 95.7      | .43                  |
| Gastrointestinal symptoms                  | 15                  | 14.9      | 6                | 10.5      | 9              | 20.5      | .16                  |
| Sleeping difficulties                      | 8                   | 7.9       | 5                | 10.1      | 3              | 6.8       | .73                  |
| Falls                                      | 5                   | 5         | 4                | 7.1       | 1              | 2.3       | .28                  |
| Unrest/Anxiety                             | 4                   | 4         | 3                | 6.1       | 1              | 2.3       | .45                  |
| Confusion                                  | 4                   | 4         | 4                | 6.1       | 0              | 0         | .07                  |
| Hallucinations                             | 3                   | 3         | 3                | 5.1       | 0              | 0         | .12                  |
| Infection                                  | 9                   | 8.9       | 3                | 5.1       | 6              | 13.6      | .14                  |

Listed is the number of unserious adverse events that occurred in  $\geq 5\%$  of patients receiving bupropion.

<sup>‡</sup> P values for categorical data: Chi<sup>2</sup>-test; P values for nonparametric data: Mann Whitney U-Test
